# Supplementary material for: Switchable mechanical DNA “arms” operating on nucleic acid scaffolds associated with electrodes or semiconductor quantum dots
Source: Royal Society of Chemistry journal article supplement (doi:10.1039/c3nr02653a), 2013-01-01
Supplement: c3nr02653a.pdf [file c3nr02653a.pdf]

Supplementary information for the paper:

**Switchable Mechanical DNA “Arms” Operating on Nucleic  
Acid Scaffolds Associated with Electrodes or Semiconductor  
Quantum Dots**

**Gilad Pelossof, Ran Tel-Vered, Xiaoqing Liu and Itamar Willner**

## Experimental Section

*Materials.*  $\beta$ -Cyclodextrin, adamantane carboxylic acid, 4-carboxyphenyl boronic acid, ferrocene carboxylic acid, (N-(3-Dimethylaminopropyl)-N'-ethylcarbodiimide hydrochloride) (EDC), N-Hydroxysuccinimide (NHS), and adenosine monophosphate (AMP), were purchased from Sigma-Aldrich. Core/shell CdSe/ZnS quantum dots (6 nm diameter) were purchased from Evident Technologies (USA). Ultrapure water from a NANOpure Diamond (Barnstead Int., USA) source was used throughout the experiments. All oligonucleotides were purchased from Integrated DNA Technologies Inc. (USA). The following DNA sequences were used:

(1) 5'-NH<sub>2</sub>-TATCAG TCATCCAACGAA-3'

(3) 5'-NH<sub>2</sub>-TTGGGAACCTTCCTGGGGGAGTATTGCGGAGGAAGGTTCCCAC  
TAAGGCATGA

(5) 5'-SH-TTTTTTCGTTGGATGATCATGCCTTAGT-3'

(6) 5'-GGGAACCTTCCTCCGCAATACACCAT-3'

(7) 5'-ATGGTGTATTGCGGAGGAAGGTTCCC-3'

(8) 5'-NH<sub>2</sub>-TAACCTGGGGGAGTATTGCGGAGGAAGGTACTAAGG CATGA-3'

*Chemical modifications and assembly of the systems.* The  $\beta$  cyclodextrin-modified nucleic acid (2) was prepared by incubating the oligonucleotide (1), 100  $\mu$ M, and 4-carboxyphenyl boronic acid, 1 mM, for 1 hour in a phosphate buffer solution, PB, (10 mM, pH=7.2) that contained 10 mM EDC/NHS, followed by the separation of the resulting boronic acid-modified sequence (2) using a 3 kDa Amicon filter. The boronic acid-modified (2) was, then, reacted with  $\beta$ -cyclodextrin, 1 mM, for 1 hour in PB (100 mM, pH=8.2), and the resulting product was purified using the Amicon filter.

Ferrocene-modified (4), or (9), were prepared by incubating nucleic acids (3) or (8), 100  $\mu$ M, and ferrocene carboxylic acid, 1 mM, for 1 hour in a PB solution (pH=7.2) that contained 10 mM EDC/NHS, followed by the separation of the resulting product using the Amicon filter. The modified nucleic acids (2), (4), or (9), were hybridized for 20 minutes with the scaffold sequence (5), at a 1.2:1.0 ratio (in the presence of adamantane carboxylic acid, 1mM), to form the thiolated nucleic acid functional structures.

Clean Au wires were treated for 30 minutes with an aqueous solution of 3-mercaptopethanol, 2 mM. The resulting mercaptopethanol monolayer-modified Au

wires were, then, reacted with the thiolated nucleic acid functional structures for 6 hours to yield the functionalized systems on the electrodes surfaces. Prior to the experiments, the electrodes were extensively washed with a PB solution (pH=8.2, containing 0.1 M NaCl and 0.1 M KCl), to remove any remains of the adamantane molecules, until a steady and reproducible electrochemical signal appeared.

DNA-modified quantum dots were prepared according to a previously reported procedure.<sup>1</sup>

*Instrumentation and measurements.* Absorbance measurements were carried out using a Shimadzu UV-2401PC UV/Vis spectrophotometer. Emission experiments were performed using a Cary Eclipse Fluorimeter (Varian Inc.). Differential pulse voltammograms were recorded using a PC-controlled (Autolab GPES software) potentiostat (modulation amplitude: 100 mV, step potential: 10 mV). A Au wire (d=0.5 mm), a graphite rod (d=3 mm), and a saturated calomel (SCE) electrodes were used as the working, counter and reference electrodes, respectively. All measurements were performed in a 10 mM phosphate buffer (pH=8.2, containing 0.1 M NaCl and 0.1 M KCl).

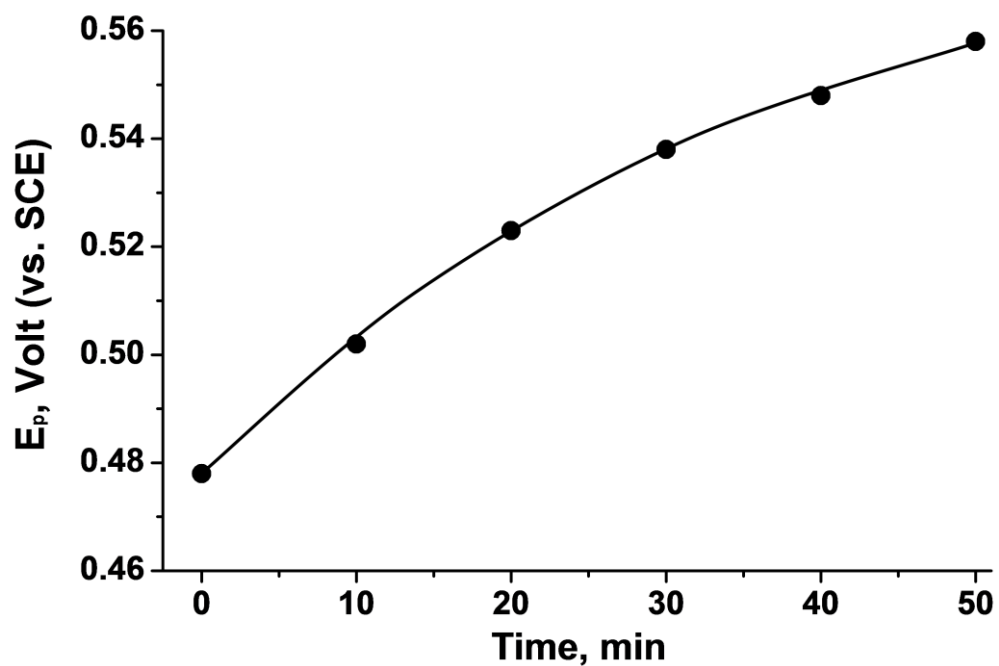

**Figure S1.** Time-dependent potential values corresponding to the peak amperometric responses of the Fc unit, upon the interaction of the system in State II, with the anti-fuel (7).

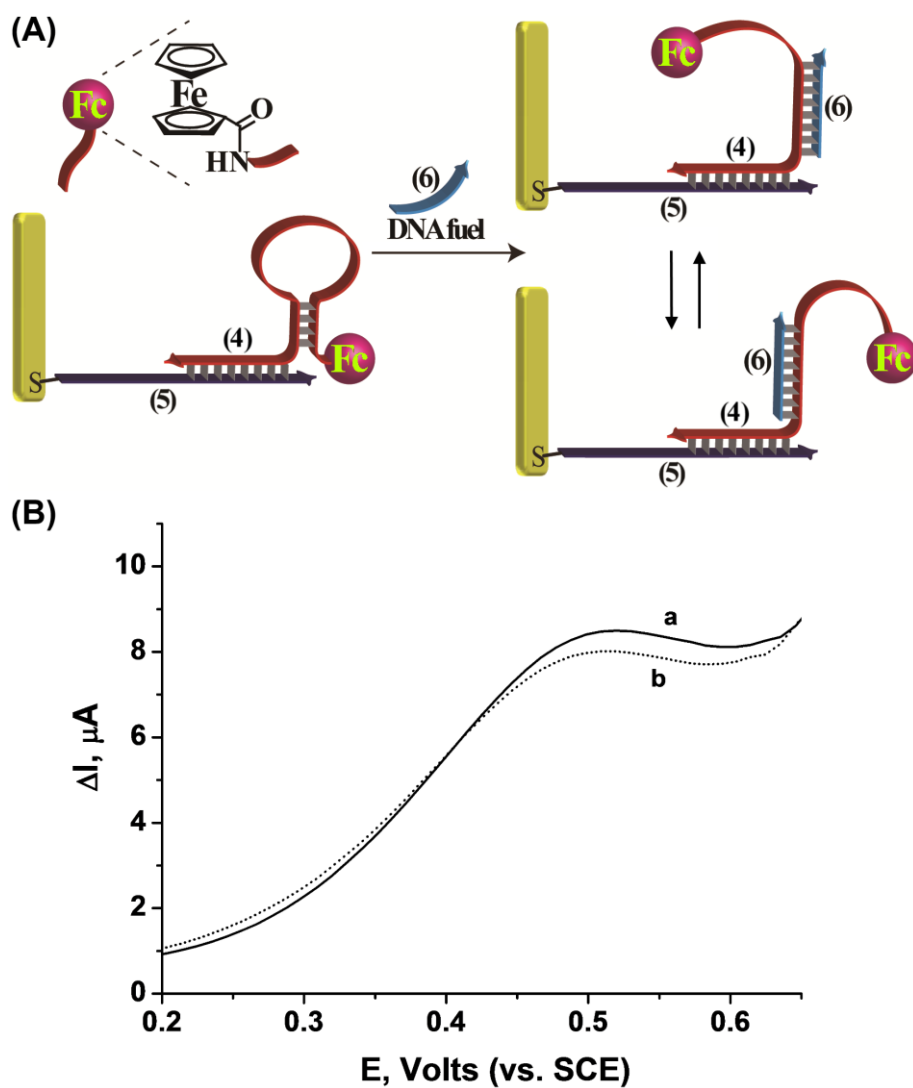

**Figure S2.** (A) DNA fuel (6)-triggered opening of a Fc-functionalized nucleic acid hairpin (4) hybridized to a DNA scaffold (5), linked to a Au electrode. (B) Differential pulse voltammograms corresponding to the system: (a) Before addition of (6), and (b) After incubation for 30 minutes with (6), 1  $\mu\text{M}$ .

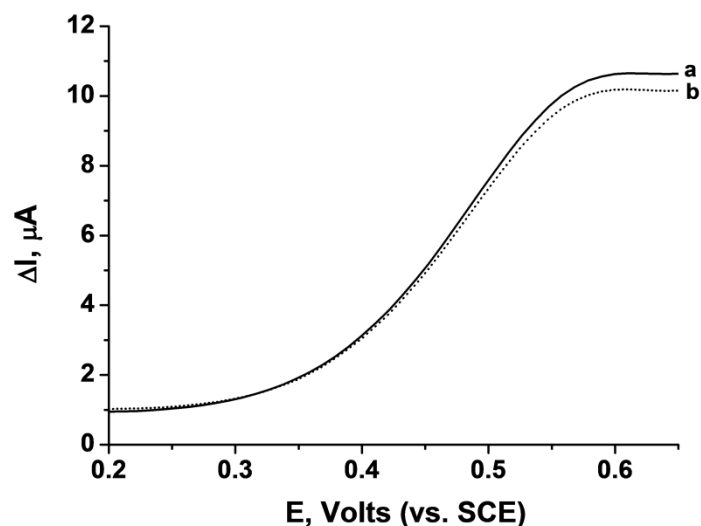

**Figure S3.** Differential pulse voltammograms corresponding to the AMP-triggered opening of a Fc-functionalized nucleic acid hairpin (**4**) hybridized to a DNA scaffold (**5**), linked to a Au electrode: (a) Before addition of AMP, and (b) After incubation for 30 minutes with AMP, 100  $\mu M$ .

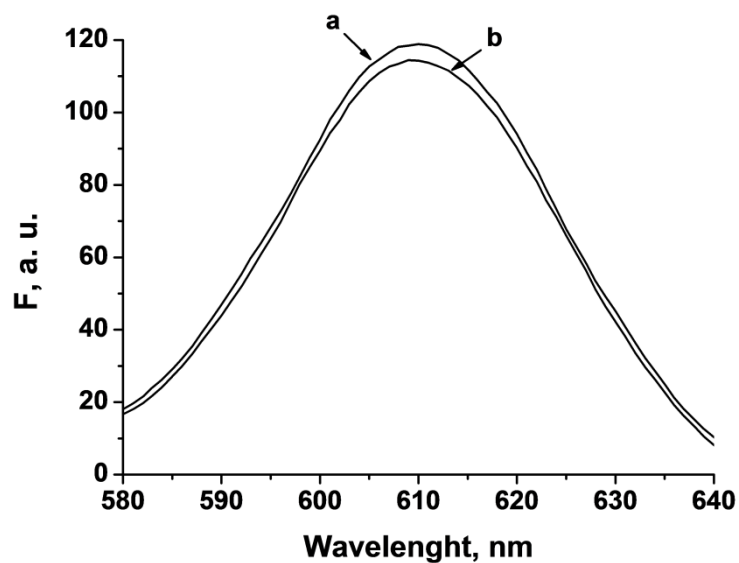

**Figure S4.** Emission responses corresponding to the DNA fuel (**6**)-triggered opening of a Fc-functionalized nucleic acid hairpin (**4**) hybridized to a DNA scaffold (**5**), linked to a CdSe/ZnS quantum dot: (a) Before addition of (**6**), and (b) After incubation for 20 minutes with (**6**).

## References:

1. F. Patolsky, R. Gill, Y. Weizmann, T. Mokari, U. Banin, I. Willner, *J. Am. Chem. Soc.*, 2003, **125**, 13918-13919.
